# Supplementary material for: 3-Hydroxytanshinone Inhibits the Activity of Hypoxia-Inducible Factor 1-α by Interfering with the Function of α-Enolase in the Glycolytic Pathway
Source: MDPI journal article supplement (doi:10.3390/molecules29102218), 2024-05-09
Supplement: s1 [file s1]

# 3-Hydroxytanshinone Inhibits the Activity of Hypoxia-Inducible Factor 1- $\alpha$ by Interfering with the Function of $\alpha$ -Enolase in the Glycolytic Pathway

Tae Hyun Son <sup>1,†</sup>, Shin-Hye Kim <sup>2,†</sup>, Hye-Lim Shin <sup>2,3</sup>, Dongsoo Kim <sup>2</sup>, Hwan Gyu Kim <sup>3</sup>, Yongseok Choi <sup>1,\*</sup> and Sik-Won Choi <sup>2,\*</sup>

<sup>1</sup> School of Life Sciences and Biotechnology, Korea University, Seoul 02841, Republic of Korea; snoopyegg@korea.ac.kr

<sup>2</sup> Forest Biomaterials Research Center, National Institute of Forest Science (NIFoS), Jinju 52817, Republic of Korea; black7a@korea.kr (S.-H.K.); hlims0901@korea.kr (H.-L.S.); skimds@korea.kr (D.K.)

<sup>3</sup> Department of Biological Sciences, Jeonbuk National University, Jeonju 54896, Republic of Korea; hgkim@jbnu.ac.kr

\* Correspondence: ychoi@korea.ac.kr (Y.C.); superwon@korea.kr (S.-W.C.); Tel.: +82-2-3290-3426 (Y.C.); +82-55-760-5093 (S.-W.C.); Fax: +82-55-759-8432 (S.-W.C.)

<sup>†</sup> These authors contributed equally to this work.

**Citation:** Son, T.H.; Kim, S.-H.; Shin, H.-L.; Kim, D.; Kim, H.G.; Choi, Y.; Choi, S.-W. 3-Hydroxytanshinone Inhibits the Activity of Hypoxia-Inducible Factor 1- $\alpha$  by Interfering with the Function of  $\alpha$ -Enolase in the Glycolytic Pathway. *Molecules* **2024**, *29*, 2218. <https://doi.org/10.3390/molecules29102218>

Academic Editors: Luciana Scotti and Marcus Tullius Scotti

Received: 5 April 2024

Revised: 29 April 2024

Accepted: 7 May 2024

Published: 9 May 2024

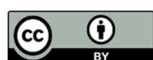

**Copyright:** © 2024 by the authors. Licensee MDPI, Basel, Switzerland. This article is an open access article distributed under the terms and conditions of the Creative Commons Attribution (CC BY) license (<https://creativecommons.org/licenses/by/4.0/>).

3-Hydroxytanshinone

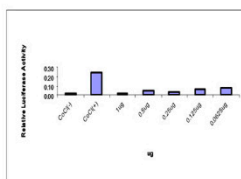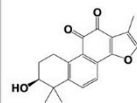

C19H18O4

Mol. Wt.: 310.34

(S)-1,6,6-trimethyl-10,11-dioxo-6,7,8,9,10,11-hexahydrophenanthro[1,2-b]furan-7-yl propionate

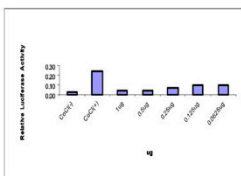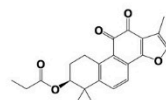

C22H22O5

Mol. Wt.: 366.41

(S)-1,6,6-trimethyl-10,11-dioxo-6,7,8,9,10,11-hexahydrophenanthro[1,2-b]furan-7-yl benzoate

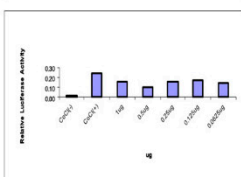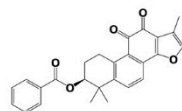

C26H22O5

Mol. Wt.: 414.45

(S)-7-(2-hydroxyethoxy)-1,6,6-trimethyl-6,7,8,9-tetrahydrophenanthro[1,2-b]furan-10,11-dione

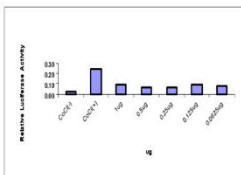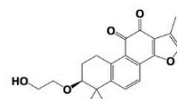

C21H22O5

Mol. Wt.: 354.4

Biotinylated-3-hydroxytanshinone

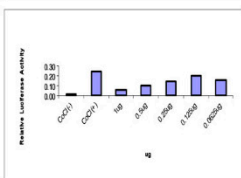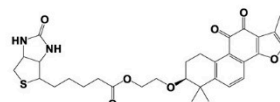

C31H36N2O7S

Mol. Wt.: 580.6

(S)-2-((1,6,6-trimethyl-10,11-dioxo-6,7,8,9,10,11-hexahydrophenanthro[1,2-b]furan-7-yl)oxy)ethyl 2-(3-(trifluoromethyl)-3H-diazirin-3-yl)phenoxyacetate

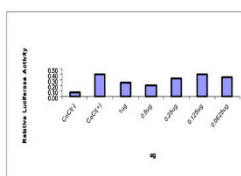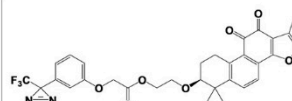

C31H27F3N2O7

Mol. Wt.: 596.55

6-(hydroxymethyl)-1,6-dimethyl-6,7,8,9-tetrahydrophenanthro[1,2-b]furan-10,11-dione

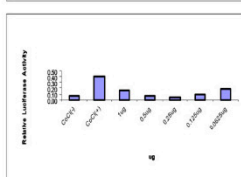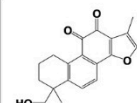

C19H18O4

Mol. Wt.: 310.34

(1,6-dimethyl-10,11-dioxo-6,7,8,9,10,11-hexahydrophenanthro[1,2-b]furan-6-yl)methyl 2-(2-hydroxyethoxy)acetate

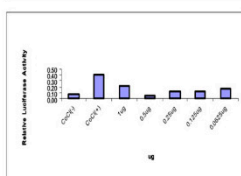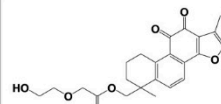

C23H24O7

Mol. Wt.: 412.43

2-((1,6-dimethyl-10,11-dioxo-6,7,8,9,10,11-hexahydrophenanthro[1,2-b]furan-6-yl)methoxy)-2-oxoethoxyethyl 2-(3-(trifluoromethyl)-3H-diazirin-3-yl)phenoxyacetate

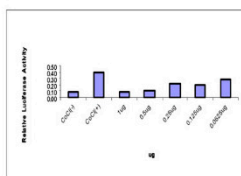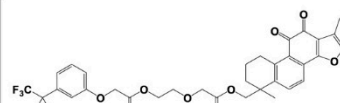

C33H29F3N2O9

Mol. Wt.: 654.59

2-((1,6-dimethyl-10,11-dioxo-6,7,8,9,10,11-hexahydrophenanthro[1,2-b]furan-6-yl)methoxy)-2-oxoethoxyethyl 5-(2-oxohexahydro-1H-thieno[3,4-d]imidazol-4-yl)pentanoate

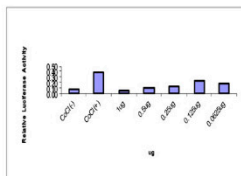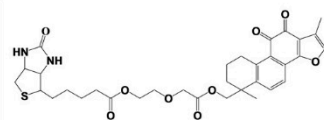

C33H38N2O9S

Mol. Wt.: 638.73

**Supplementary Figure S1.** Tanshinone derivatives regulates HIF-1 $\alpha$  activity. A mixture (3:1) of two stable cell lines (HeLa-hypoxia response element [HRE]-firefly luciferase [FL] and HeLa-CMV-Renilla luciferase [RL]) was plated into 96-well plates at a density of 4000 cells per well. The cells were incubated for 16 hours in the presence of CoCl<sub>2</sub> with the indicated concentrations of tanshinone derivatives. Luciferase activity was determined. Activity is expressed as fold induction relative to the activity in the absence of CoCl<sub>2</sub>. HeLa-CMV-RL activity was used to normalize luciferase activity.
